# Supplementary material for: Reporting Quality of Studies Developing and Validating Melanoma Prediction Models: An Assessment Based on the TRIPOD Statement
Source: MDPI journal article supplement (doi:10.3390/healthcare10020238), 2022-01-26
Supplement: s1 [file s1]

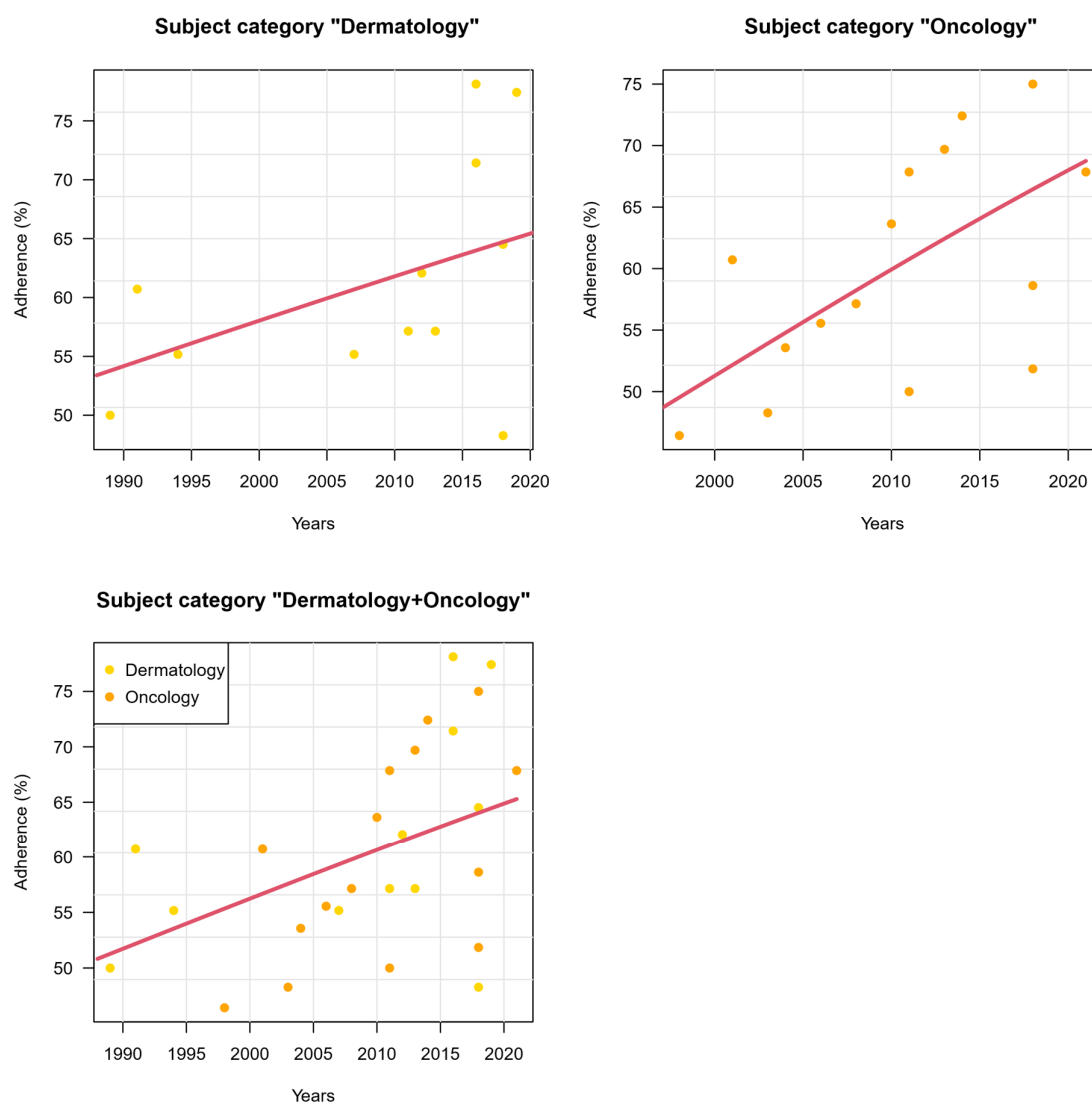

**Figure S1:** Relationship between TRIPOD adherence and publication year based on studies from different subject categories. Red lines represent the predicted mean curve from a beta regression model. 1) Only studies of the subject category “Dermatology” (N=12),  $p<0.05$ ; 2) only studies of the subject category “Oncology” (N=15),  $p<0.01$ ; 3) studies of both subject categories “Dermatology” and “Oncology” (N=27),  $p<0.01$ .

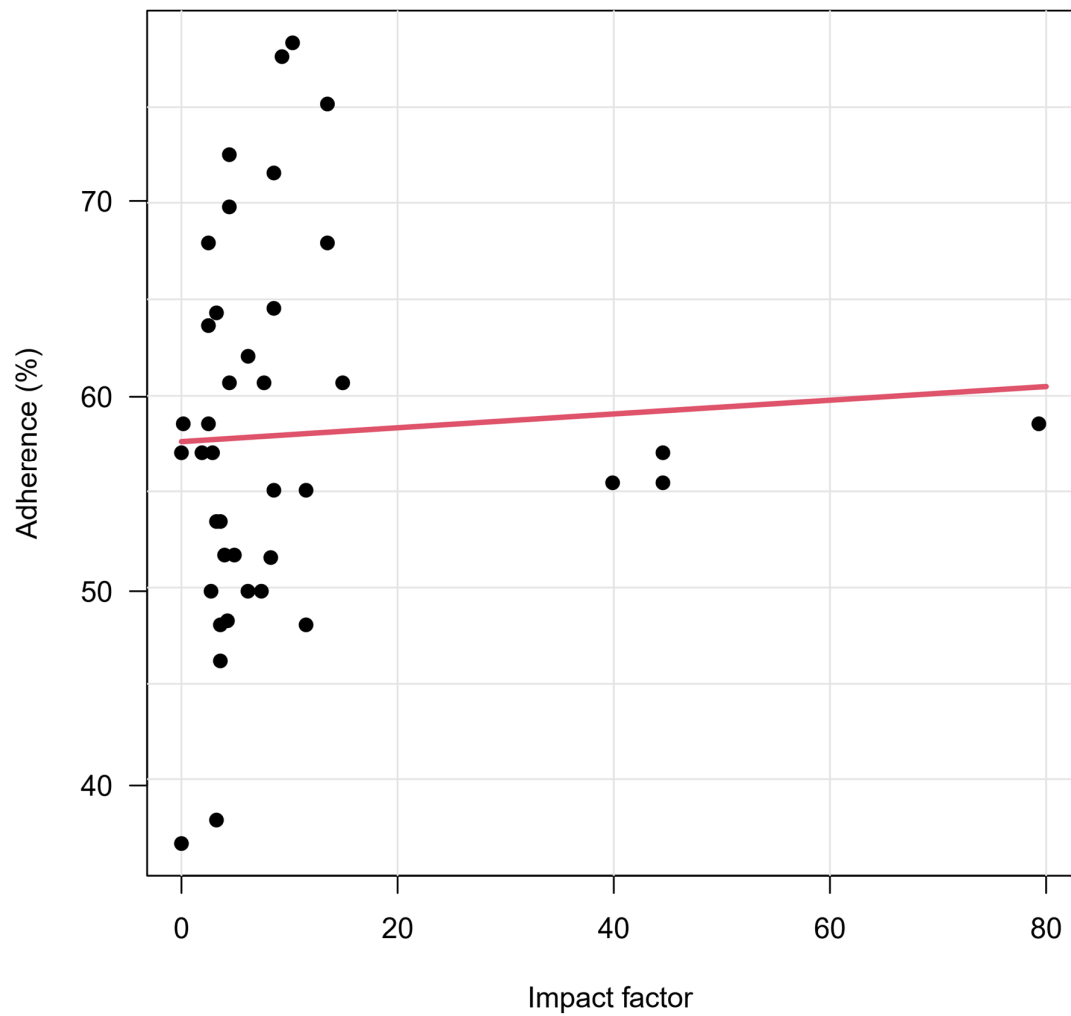

**Figure S2:** Relationship between TRIPOD adherence and impact factor. Red line represents the predicted mean curve from a beta regression model based on 40 studies (two studies were excluded, see text)
